# Supplementary material for: Temperament Predicts the Quality of Social Interactions in Captive Female Rhesus Macaques (Macaca mulatta)
Source: MDPI journal article supplement (doi:10.3390/ani11082452), 2021-08-20
Supplement: s1 [file s1]

## Supplementary File S1 - Temperament Ratings

At the end of the 25-hr assessment, each animal was rated on a 1-7 scale for each of 16 traits.

Active, energetic: Moves about a lot, distance traveled by walking, running, climbing, or jumping. Not lethargic.

Aggressive: High frequency of displays, threats.

Bold: fearless; Is daring, not restrained or tentative. Not timid, shy, or coy.

Calm, equable: Reacts in an even, calm way; is not easily disturbed. Not agitated. Restful, peaceful.

Confident: Behaves in a positive, assured manner, not restrained or tentative.

Curious, exploratory, inquisitive: Readily explores new situations, seeking out or investigating novel situation.

Depressed: Subject appears isolated, withdrawn, sullen, brooding, and has reduced activity. Fearful: Fear grins; retreats readily from others or from outside disturbances.

Flexible, not rigid: Adapts to situations. Is able to accommodate new ways of doing things.

Gentle: Subject responds to technicians in an easy-going, kind, and considerate manner. Subject is not rough or threatening.

Nervous, anxious, not calm: Jittery, anxious, seems to be anxious about everything.

Playful: Engages in self-play (hanging, swinging, jumping), or object play.

Slow: Moves and sits in a relaxed manner; moves slowly and deliberately, not easily hurried.

Tense: Shows restraint in posture and movement; carries the body stiffly, which suggests a shrinking tendency, as if trying to pull back and be less conspicuous.

Timid: Subject is easily alarmed and is hesitant to venture into new situations.

Vigilant, alert: Ready, attentive, watchful, notices with special attention. Not oblivious to surroundings.

Supplementary Table S1 - Biobehavioral assessment data collected in infancy (Z scores) and behavioral data recorded during the social introduction process (protected and full contact) among the 20 female pairs included in the study (number of intervals in which the behavior was recorded). Each pair is represented in two rows, one for each subject.

|         |           |            |               | Biobehavioral assessment data |                     |                             |       | Protected contact phase |                  |                                |                   | Full contact phase   |                  |                                |                   |
|---------|-----------|------------|---------------|-------------------------------|---------------------|-----------------------------|-------|-------------------------|------------------|--------------------------------|-------------------|----------------------|------------------|--------------------------------|-------------------|
| Pair ID | Animal ID | Partner ID | Date of birth | Day 1 emotionality            | Nervous temperament | Human intruder emotionality | Novpa | Affiliative behavior    | Anxious behavior | Dominance/subordinate behavior | Abnormal behavior | Affiliative behavior | Anxious behavior | Dominance/subordinate behavior | Abnormal behavior |
| 1       | 1a        | 1b         | 04/22/10      | 1.18684                       | 2.43758             | -0.45227                    | 0.71  | 10                      | 0                | 0                              | 0                 | 10                   | 2                | 0                              | 0                 |
| 1       | 1b        | 1a         | 03/30/12      | 0.72097                       | 2.06302             | 2.95997                     | 0.68  | 16                      | 7                | 0                              | 1                 | 15                   | 8                | 0                              | 0                 |
| 2       | 2a        | 2b         | 04/04/07      | -0.74956                      | -1.55460            | -0.39174                    | 0.56  | 2                       | 4                | 0                              | 0                 | 6                    | 1                | 2                              | 0                 |
| 2       | 2b        | 2a         | 03/14/13      | -0.72048                      | -0.25220            | -0.53651                    | 0.53  | 7                       | 1                | 0                              | 0                 | 14                   | 1                | 0                              | 0                 |
| 3       | 3a        | 3b         | 04/06/03      | -0.36519                      | 0.15104             | -0.41347                    | 0.60  | 22                      | 7                | 0                              | 0                 | 26                   | 3                | 0                              | 0                 |
| 3       | 3b        | 3a         | 03/27/12      | 1.58568                       | -0.92253            | 1.80109                     | 0.66  | 10                      | 1                | 0                              | 0                 | 27                   | 0                | 0                              | 0                 |
| 4       | 4a        | 4b         | 03/08/07      | -0.44464                      | 0.75165             | -0.39174                    | 0.75  | 2                       | 1                | 0                              | 1                 | 8                    | 2                | 0                              | 0                 |
| 4       | 4b        | 4a         | 04/15/08      | 0.58674                       | 0.60645             | -0.50557                    | 0.90  | 3                       | 3                | 0                              | 0                 | 1                    | 0                | 0                              | 0                 |
| 5       | 5a        | 5b         | 04/08/10      | -0.80276                      | 1.11820             | -0.45227                    | 0.49  | 8                       | 7                | 1                              | 0                 | 12                   | 6                | 0                              | 0                 |
| 5       | 5b        | 5a         | 06/30/10      | 2.29255                       | 2.87599             | -0.45227                    | 0.68  | 9                       | 7                | 0                              | 0                 | 16                   | 1                | 0                              | 0                 |
| 6       | 6a        | 6b         | 07/10/06      | -0.22686                      | -0.55591            | -0.09346                    | 0.50  | 28                      | 1                | 0                              | 1                 | 39                   | 0                | 0                              | 0                 |
| 6       | 6b        | 6a         | 04/04/07      | -0.41790                      | -1.31181            | -0.39174                    | 0.58  | 29                      | 5                | 1                              | 0                 | 49                   | 0                | 0                              | 0                 |
| 7       | 7a        | 7b         | 03/23/10      | 0.93923                       | -0.33825            | -0.11329                    | 0.55  | 17                      | 7                | 0                              | 0                 | 31                   | 1                | 0                              | 0                 |
| 7       | 7b        | 7a         | 06/16/17      | 0.80262                       | -0.59695            | -0.59995                    | 0.61  | 26                      | 0                | 0                              | 0                 | 39                   | 1                | 0                              | 0                 |
| 8       | 8a        | 8b         | 03/23/04      | -0.05922                      | -0.84528            | -0.32587                    | 0.55  | 14                      | 8                | 0                              | 0                 | 19                   | 3                | 0                              | 0                 |
| 8       | 8b        | 8a         | 03/23/10      | -0.22580                      | 0.28902             | -0.45227                    | 0.34  | 27                      | 2                | 0                              | 0                 | 35                   | 0                | 0                              | 0                 |
| 9       | 9a        | 9b         | 06/26/05      | 0.50073                       | 1.33652             | 0.42354                     | 0.72  | 13                      | 2                | 0                              | 0                 | 20                   | 1                | 0                              | 0                 |
| 9       | 9b        | 9a         | 04/27/10      | 0.15628                       | 0.35572             | -0.45227                    | 0.49  | 24                      | 6                | 0                              | 0                 | 27                   | 0                | 0                              | 0                 |
| 10      | 10a       | 10b        | 03/09/05      | 0.11610                       | -0.42141            | -0.14369                    | 0.61  | 14                      | 5                | 0                              | 0                 | 14                   | 1                | 0                              | 0                 |
| 10      | 10b       | 10a        | 05/15/11      | 1.37665                       | 1.19891             | -0.31182                    | 0.67  | 22                      | 2                | 7                              | 0                 | 19                   | 0                | 0                              | 0                 |
| 11      | 11a       | 11b        | 03/07/10      | -0.80276                      | 0.90366             | -0.45227                    | 0.47  | 0                       | 3                | 0                              | 0                 | 11                   | 1                | 0                              | 0                 |
| 11      | 11b       | 11a        | 03/29/11      | -0.51857                      | -1.68364            | -0.39780                    | 0.57  | 16                      | 7                | 1                              | 1                 | 13                   | 3                | 1                              | 0                 |

|    |     |     |          |          |          |          |      |    |    |   |   |    |   |   |   |
|----|-----|-----|----------|----------|----------|----------|------|----|----|---|---|----|---|---|---|
| 12 | 12a | 12b | 05/04/13 | -0.77885 | 0.25949  | -0.53651 | 0.64 | 24 | 15 | 2 | 0 | 18 | 9 | 2 | 0 |
| 12 | 12b | 12a | 03/12/14 | -0.65539 | 0.64767  | -0.48387 | 0.83 | 24 | 3  | 0 | 0 | 20 | 0 | 0 | 0 |
| 13 | 13a | 13b | 04/12/06 | -0.83874 | 0.18708  | -0.42721 | 0.35 | 4  | 0  | 1 | 0 | 1  | 1 | 0 | 0 |
| 13 | 13b | 13a | 05/13/10 | 2.06684  | -0.43370 | -0.45227 | 0.46 | 2  | 2  | 0 | 0 | 0  | 0 | 0 | 0 |
| 14 | 14a | 14b | 04/17/02 | -0.18922 | 1.55485  | -0.42905 | 0.40 | 16 | 1  | 0 | 0 | 22 | 1 | 0 | 0 |
| 14 | 14b | 14a | 04/02/06 | -0.26687 | 0.68138  | 1.01748  | 0.34 | 10 | 0  | 0 | 0 | 23 | 0 | 0 | 0 |
| 15 | 15a | 15b | 07/10/10 | 1.82472  | -0.09847 | -0.45227 | 0.44 | 8  | 1  | 0 | 2 | 7  | 1 | 0 | 0 |
| 15 | 15b | 15a | 03/21/13 | 0.77520  | -0.06254 | -0.53651 | 0.54 | 20 | 0  | 0 | 0 | 4  | 0 | 0 | 0 |
| 16 | 16a | 16b | 04/02/08 | -0.48695 | -0.25598 | -0.50557 | 0.34 | 2  | 7  | 0 | 0 | 6  | 3 | 0 | 0 |
| 16 | 16b | 16a | 06/21/13 | -0.77885 | 1.17638  | 1.37080  | 0.64 | 21 | 0  | 0 | 0 | 20 | 0 | 2 | 0 |
| 17 | 17a | 17b | 04/07/11 | 0.11774  | 0.21871  | 0.12426  | 0.61 | 13 | 3  | 3 | 1 | 10 | 2 | 0 | 2 |
| 17 | 17b | 17a | 04/19/11 | -0.62606 | -1.06974 | 1.38127  | 0.64 | 6  | 13 | 0 | 0 | 11 | 6 | 0 | 0 |
| 18 | 18a | 18b | 03/18/08 | -0.81791 | -0.80311 | -0.50557 | 0.49 | 10 | 6  | 0 | 0 | 29 | 7 | 3 | 0 |
| 18 | 18b | 18a | 05/09/15 | -0.56234 | 1.11740  | -0.49183 | 0.72 | 10 | 2  | 0 | 0 | 37 | 4 | 0 | 0 |
| 19 | 19a | 19b | 04/02/02 | -0.87906 | -0.17886 | -0.45397 | 0.70 | 3  | 8  | 0 | 0 | 5  | 4 | 0 | 0 |
| 19 | 19b | 19a | 06/01/16 | 0.06371  | 0.87658  | -0.50157 | 0.55 | 7  | 0  | 4 | 4 | 0  | 3 | 0 | 8 |
| 20 | 20a | 20b | 03/18/01 | -0.75412 | 0.39066  | -0.34996 | 0.50 | 10 | 2  | 0 | 0 | 13 | 1 | 0 | 0 |
| 20 | 20b | 20a | 03/26/18 | 0.21382  | 0.01243  | 3.79300  | 0.39 | 14 | 0  | 2 | 0 | 18 | 1 | 1 | 0 |
